# Supplementary material
Source: PubMed Central journal article supplement (PMC3552260)
Supplement: mmc1.pdf [file mmc1.pdf]

**Supplemental Information for:**  
**Understanding the role of amphipathic helices in N-**  
**BAR domain driven membrane remodeling**

Haosheng Cui,<sup>†</sup> Carsten Mim,<sup>‡§</sup> Francisco X. Vázquez,<sup>†</sup> Edward Lyman,<sup>¶</sup> Vinzenz M. Unger,<sup>‡§</sup> and Gregory A. Voth<sup>†</sup>

<sup>†</sup>Department of Chemistry, Institute for Biophysical Dynamics, James Franck Institute, and Computation Institute, University of Chicago, 5735 S Ellis Ave., Chicago, IL 60637

<sup>‡</sup>Department of Molecular Biosciences, Northwestern University, 2205 Campus Drive, Evanston IL 60208

<sup>§</sup>Chemistry of Life Processes Institute, Northwestern University, 2170 Campus Drive, Evanston, IL 60208

<sup>¶</sup>Department of Physics and Astronomy, Department of Chemistry and Biochemistry, University of Delaware, Newark, DE 19716

## SUPPLEMENTAL TEXT

### Membrane liposome and H0 interactions

A multi-component lipid membrane with 1:1 DOPC:DOPS is used. This composition captures the negative surface charge density that is essential for BAR domain binding, and necessitates incorporating screened electrostatic interactions in the simulation. Charge distributions are modeled based on the charges of the CG protein sites and the PS headgroups, which each carry a charge of  $-1e$ . Figure S1 shows a snapshot of a protein coated membrane liposome after 5 million timesteps, where the left panel shows the H0 density map on the liposome and on the right shows the local membrane curvature near each lipid. The local membrane curvature was approximated by the local radial variation, represented in a spherical basis—that is, by comparing the radial position of each lipid to the average radial position of all lipids in the liposome. Areas of locally curved membrane are evident on the surface of the liposome.

## SUPPLEMENTAL FIGURE

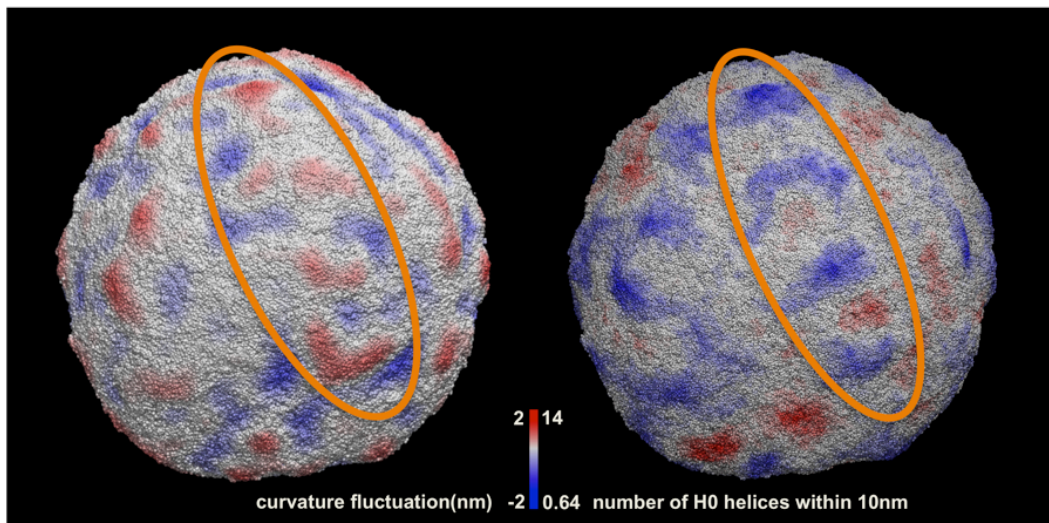

**Figure S1:** A comparison between the local membrane curvature fluctuation and H0 helix density for one simulation snapshot of a full liposome simulation. The left panel shows the local membrane curvature fluctuation calculated using radial variation as described in the main text, where red color indicates a convex surface and blue indicates a concave surface. The right panel shows lipids colored by the number of H0 helices within 10nm radius. Circles qualitatively highlight the correlation between curvature fluctuation and H0 helix density.

# SUPPLEMENTAL TABLES

**Table S1** Equilibration distances (nm) and harmonic constants (kJ/(mol nm<sup>2</sup>)) in the 26-site zigzag N-BAR hENM model. Results in downloadable form are also give as supplemental files.

| Equilibration distance | 1     | 2     | 3     | 4     | 5     | 6     | 7     | 8     | 9     | 10    | 11    | 12    | 13    | 14    | 15    | 16    | 17    | 18    | 19    | 20    | 21    | 22    | 23    | 24    | 25    | 26    |       |   |
|------------------------|-------|-------|-------|-------|-------|-------|-------|-------|-------|-------|-------|-------|-------|-------|-------|-------|-------|-------|-------|-------|-------|-------|-------|-------|-------|-------|-------|---|
| 1                      | 0     | 1.988 | 3.331 | 5.319 | 6.729 | 7.324 | 6.198 | 4.048 | 3.434 | 4.197 | 4.166 | 5.739 | 7.780 | 10.23 | 9.216 | 7.734 | 4.942 | 4.350 | 3.869 | 5.139 | 7.274 | 9.491 | 9.551 | 6.265 | 5.219 |       |       |   |
| 2                      | 83    | 0     | 2.192 | 4.677 | 5.783 | 6.946 | 5.486 | 2.551 | 1.549 | 2.246 | 2.645 | 5.026 | 7.497 | 9.826 | 9.121 | 7.620 | 4.790 | 4.828 | 3.354 | 5.018 | 7.436 | 9.695 | 9.856 | 8.272 | 6.009 | 4.414 |       |   |
| 3                      | 34    | 97    | 0     | 3.103 | 4.258 | 5.080 | 3.443 | 1.113 | 2.922 | 2.944 | 1.142 | 2.862 | 5.472 | 8.475 | 7.736 | 5.958 | 3.275 | 3.696 | 1.401 | 3.167 | 5.940 | 8.404 | 8.497 | 6.601 | 4.012 | 2.336 |       |   |
| 4                      | 88    | 19    | 88    | 0     | 1.657 | 2.518 | 1.726 | 2.845 | 5.362 | 5.382 | 3.690 | 2.418 | 3.657 | 5.381 | 4.711 | 3.225 | 1.341 | 2.867 | 2.746 | 2.477 | 3.467 | 5.570 | 5.815 | 4.150 | 2.763 | 3.581 |       |   |
| 5                      | 71    | 14    | 79    | 08    | 0     | 2.771 | 2.306 | 3.625 | 6.111 | 5.966 | 4.496 | 3.273 | 4.109 | 4.538 | 4.484 | 3.528 | 2.885 | 4.453 | 4.126 | 3.856 | 4.167 | 5.685 | 6.093 | 4.624 | 3.743 | 4.534 |       |   |
| 6                      | 5     | 88    | 14    | 83    | 73    | 0     | 2.771 | 1.890 | 5.016 | 7.708 | 7.636 | 5.559 | 2.829 | 1.597 | 4.407 | 3.406 | 1.330 | 2.437 | 3.578 | 4.148 | 2.709 | 2.116 | 4.199 | 4.226 | 2.116 | 1.981 | 4.386 |   |
| 7                      | 71    | 64    | 06    | 98    | 52    | 29    | 0     | 3.332 | 6.095 | 5.920 | 3.746 | 1.148 | 2.403 | 5.799 | 5.081 | 3.113 | 2.088 | 3.408 | 2.659 | 1.966 | 3.586 | 5.936 | 5.999 | 3.841 | 1.631 | 2.693 |       |   |
| 8                      | 02    | 06    | 23    | 49    | 2     | 86    | 94    | 0     | 2.794 | 2.623 | 1.124 | 3.012 | 5.622 | 8.035 | 7.547 | 5.954 | 3.462 | 4.266 | 2.188 | 3.666 | 6.099 | 8.383 | 8.581 | 6.747 | 4.322 | 2.800 |       |   |
| 9                      | 14    | 88    | 51    | 96    | 05    | 19    | 92    | 79    | 0     | 2.677 | 7.7   | 14    | 1     | 16    | 79    | 24    | 48    | 6.3   | 2.3   | 56    | 47    | 10.30 | 9.271 | 6.901 | 4.979 |       |       |   |
| 10                     | 8     | 61    | 45    | 92    | 34    | 1     | 45    | 46    | 26    | 0     | 2.430 | 5.458 | 8.183 | 10.36 | 10.02 | 8.549 | 5.948 | 6.447 | 4.322 | 6.086 | 8.634 | 10.85 | 11.08 | 9.338 | 6.834 | 4.712 |       |   |
| 11                     | 34    | 85    | 8     | 77    | 23    | 68    | 11    | 4     | 77    | 76    | 0     | 3.096 | 5.876 | 8.930 | 8.371 | 6.590 | 4.121 | 4.734 | 2.175 | 3.884 | 9.163 | 9.279 | 7.280 | 4.527 | 2.310 |       |       |   |
| 12                     | 5     | 82    | 84    | 12    | 61    | 62    | 51    | 05    | 14    | 31    | 81    | 0     | 8.5   | 62    | 94    | 32    | 7     | 22    | 5     | 31    | 18    | 8.3   | 6.3   | 26    | 18    | 5.78  |       |   |
| 13                     | 7.780 | 7.497 | 5.472 | 3.657 | 4.109 | 1.597 | 2.403 | 5.622 | 8.311 | 8.183 | 5.876 | 2.799 | 0     | 5.689 | 4.551 | 2.356 | 3.283 | 3.993 | 4.295 | 2.669 | 2.826 | 5.052 | 4.800 | 2.381 | 1.563 | 4.130 |       |   |
| 14                     | 10.23 | 9.826 | 8.475 | 5.381 | 4.538 | 4.407 | 5.799 | 8.035 | 10.37 | 10.36 | 8.930 | 6.934 | 5.689 | 0     | 1.982 | 3.785 | 5.758 | 6.843 | 7.985 | 6.848 | 4.459 | 3.263 | 4.034 | 4.473 | 6.362 | 8.479 |       |   |
| 15                     | 9.216 | 9.121 | 7.736 | 4.711 | 4.484 | 3.406 | 5.081 | 7.547 | 9.928 | 10.02 | 8.371 | 6.113 | 4.551 | 1.982 | 0     | 2.330 | 4.631 | 5.402 | 7.014 | 5.620 | 2.712 | 1.488 | 2.189 | 2.771 | 5.184 | 7.642 |       |   |
| 16                     | 7.734 | 7.620 | 5.958 | 3.225 | 3.528 | 1.330 | 3.113 | 5.954 | 8.510 | 8.549 | 6.590 | 4.001 | 2.356 | 3.785 | 2.330 | 0     | 2.858 | 3.661 | 5.011 | 3.429 | 1.100 | 2.897 | 2.910 | 1.142 | 2.883 | 5.501 |       |   |
| 17                     | 4.942 | 4.790 | 3.275 | 1.341 | 2.885 | 2.437 | 2.088 | 3.462 | 5.798 | 5.948 | 4.121 | 2.489 | 3.283 | 5.758 | 4.631 | 2.858 | 0     | 1.585 | 2.479 | 1.635 | 2.704 | 5.152 | 5.226 | 3.505 | 2.194 | 3.570 |       |   |
| 18                     | 4.350 | 4.828 | 3.696 | 2.867 | 4.453 | 3.578 | 3.408 | 4.266 | 6.130 | 6.447 | 4.734 | 3.223 | 3.993 | 6.843 | 5.402 | 3.661 | 1.585 | 0     | 2.759 | 1.934 | 3.034 | 5.511 | 5.407 | 3.895 | 2.811 | 4.071 |       |   |
| 19                     | 3.869 | 3.354 | 1.401 | 2.746 | 4.126 | 4.148 | 2.659 | 2.188 | 4.298 | 4.322 | 2.175 | 1.916 | 4.295 | 7.985 | 7.014 | 5.011 | 2.479 | 2.759 | 0     | 1.859 | 4.930 | 7.560 | 7.534 | 5.498 | 2.764 | 1.623 |       |   |
| 20                     | 5.139 | 5.018 | 3.167 | 2.477 | 3.856 | 2.709 | 1.966 | 3.666 | 6.045 | 6.086 | 3.884 | 1.658 | 2.669 | 6.848 | 5.620 | 3.429 | 1.635 | 1.934 | 1.859 | 0     | 3.291 | 6.025 | 5.881 | 3.728 | 1.143 | 2.494 |       |   |
| 21                     | 7.274 | 7.436 | 5.940 | 3.467 | 4.167 | 2.116 | 3.586 | 6.099 | 8.487 | 8.634 | 4.289 | 2.826 | 4.459 | 2.712 | 1.100 | 2.704 | 3.034 | 4.930 | 3.291 | 0     | 2.761 | 2.610 | 1.116 | 3.014 | 5.645 |       |       |   |
| 22                     | 5.9   | 9.19  | 38    | 45    | 77    | 93    | 08    | 13    | 34    | 7     | 83    | 22    | 01    | 94    | 75    | 53    | 15    | 75    | 97    | 92    | 0     | 76    | 74    | 37    | 4     | 8.296 |       |   |
| 23                     | 9.551 | 9.856 | 8.497 | 5.815 | 6.093 | 4.226 | 5.999 | 8.581 | 10.90 | 11.08 | 9.279 | 6.807 | 4.800 | 4.034 | 2.189 | 2.910 | 5.226 | 5.407 | 7.534 | 5.881 | 2.610 | 0.929 | 2.445 | 5.482 | 8.216 |       |       |   |
| 24                     | 8.186 | 8.272 | 6.601 | 4.150 | 4.624 | 2.116 | 3.841 | 6.747 | 9.271 | 9.338 | 7.280 | 4.535 | 2.381 | 4.473 | 2.771 | 1.142 | 3.505 | 5.498 | 3.728 | 1.116 | 2.795 | 2.445 | 3.125 | 0     | 7.3   | 5.935 |       |   |
| 25                     | 6.265 | 6.009 | 4.012 | 2.763 | 3.743 | 1.981 | 1.631 | 4.322 | 6.901 | 6.834 | 4.527 | 1.611 | 1.563 | 6.362 | 5.184 | 2.883 | 2.194 | 2.811 | 2.764 | 1.143 | 3.014 | 5.667 | 5.482 | 3.125 | 2.839 | 0.2   |       |   |
| 26                     | 5.219 | 4.414 | 2.336 | 3.581 | 4.534 | 4.386 | 2.693 | 2.800 | 4.979 | 4.712 | 2.310 | 1.578 | 4.130 | 8.479 | 7.642 | 5.501 | 3.570 | 4.071 | 1.623 | 2.494 | 5.645 | 8.296 | 8.216 | 2.839 | 0     | 0     |       |   |
| Harmonic constant      | 1     | 2     | 3     | 4     | 5     | 6     | 7     | 8     | 9     | 10    | 11    | 12    | 13    | 14    | 15    | 16    | 17    | 18    | 19    | 20    | 21    | 22    | 23    | 24    | 25    | 26    |       |   |
| 1                      | 0     | 41    | 9.614 | 6     | 22    | 4     | 4     | 18    | 6     | 8     | 78    | 6     | 4     | 74    | 18.81 | 8     | 8     | 4     | 6     | 6     | 2.926 | 0.4   | 4     | 3     | 6     | 4     | 0.2   |   |
| 2                      | 352.5 | 0     | 4.012 | 38.12 | 42.30 | 6.102 | 336.1 | 20.52 | 167.3 | 153.0 | 7.983 | 20.98 | 5.977 | 5.308 | 11.95 | 4.765 | 4.681 | 4.221 | 10.53 | 6.186 | 5.392 | 60.69 | 2     | 36    | 0     | 0     |       |   |
| 3                      | 9.614 | 8     | 0     | 64    | 16    | 46    | 74    | 4     | 51    | 12    | 08    | 76    | 08    | 6     | 4.389 | 7.691 | 15.84 | 5.099 | 425.6 | 83.43 | 6.102 | 9.697 | 8     | 8.36  | 6     | 9.614 | 76    | 4 |
| 4                      | 8.234 | 38.12 | 111.5 | 397.4 | 166.5 | 60.40 | 9.906 | 14.50 | 12.37 | 4.974 | 10.70 | 9.028 | 8.276 | 8.067 | 142.8 | 245.6 | 244.6 | 253.3 | 366.7 | 20.06 | 22.11 | 12.28 | 15.08 | 96.85 | 0.6   | 8.778 |       |   |
| 5                      | 28.38 | 42.30 | 13.04 | 397.4 | 12.87 | 6.771 | 6.228 | 24.62 | 23.57 | 14.33 | 7.858 | 7.398 | 9.488 | 15.75 | 160.9 | 11.74 | 70.60 | 235.2 | 77.70 | 28.59 | 23.82 | 19.26 | 17.01 | 7.691 | 6     | 2     |       |   |
| 6                      | 3.469 | 6.102 | 10.32 | 166.5 | 12.87 | 142.5 | 9.935 | 5.977 | 6.437 | 7.064 | 254.5 | 535.5 | 7.691 | 59.35 | 416.4 | 449.0 | 17.43 | 269.8 | 568.3 | 47.15 | 701.4 | 687.5 | 16.17 | 88    | 26    | 66    |       |   |
| 7                      | 3.678 | 4     | 10.45 | 428.0 | 60.40 | 6.771 | 142.5 | 481.5 | 20.35 | 18.64 | 73.19 | 1236  | 560.2 | 8.610 | 185.4 | 197.5 | 12.37 | 291.1 | 485.0 | 170.2 | 24.57 | 39.75 | 149.3 | 905.8 | 195.5 | 82    |       |   |

|    |       |       |       |       |       |       |       |       |       |       |       |       |       |       |       |       |       |       |       |       |       |       |       |       |       |
|----|-------|-------|-------|-------|-------|-------|-------|-------|-------|-------|-------|-------|-------|-------|-------|-------|-------|-------|-------|-------|-------|-------|-------|-------|-------|
| 8  | 31.39 | 336.1 | 1051. | 9.906 | 6.228 | 5.935 | 481.5 | 0     | 754.8 | 312.7 | 827.0 | 393.3 | 8.861 | 5.601 | 3.803 | 5.141 | 9.948 | 27.00 | 413.3 | 40.96 | 7.231 | 5.977 | 10.07 | 208.2 |       |
| 9  | 1.964 | 20.52 | 329.5 | 14.50 | 24.62 | 5.977 | 20.35 | 754.8 | 721.0 | 602.7 | 9.697 | 6.855 | 12.62 | 3.803 | 4.472 | 4.263 | 5.726 | 11.95 | 6.437 | 4.639 | 4.472 | 6.771 | 13.66 |       |       |
| 10 | 2.967 | 167.3 | 265.0 | 12.37 | 23.57 | 6.437 | 18.64 | 312.7 | 721.0 | 713.2 | 29.38 | 11.99 | 3.636 | 4.848 | 4.263 | 7.482 | 21.98 | 9.781 | 3.887 | 4.974 | 4.848 | 5.141 | 9.572 | 104.5 |       |
| 11 | 44.76 | 153.0 | 875.2 | 4.974 | 14.33 | 7.064 | 73.19 | 827.0 | 602.7 | 713.2 | 477.5 | 21.90 | 4.974 | 4.096 |       |       |       | 616.3 | 27.00 | 6.980 | 7.607 | 7.774 | 16.46 | 128.5 |       |
| 12 | 4.681 | 256.2 | 10.70 | 7.858 | 254.5 | 1236. | 393.3 | 9.697 | 29.38 | 477.5 | 379.6 | 7.022 | 7.858 | 23.99 | 12.12 | 28.13 | 724.0 | 983.0 | 13.25 | 15.59 | 21.98 | 35.36 | 929.2 | 314.5 |       |
| 13 | 4.723 | 7.983 | 10.70 | 9.028 | 7.398 | 535.5 | 560.2 | 8.861 | 6.855 | 11.99 | 21.90 | 379.6 | 44.43 | 98.81 | 249.0 | 19.39 | 3.678 | 16.63 | 299.9 | 222.1 | 42.92 | 133.9 | 299.5 | 22.19 |       |
| 14 | 33.14 | 20.98 | 6.771 | 8.276 | 7.691 | 5.601 | 12.62 | 4.974 | 7.022 | 44.43 | 306.9 | 3.845 | 9.028 | 7.565 | 4.890 | 6.353 | 5.977 | 97.68 | 6.729 | 7.900 | 7.064 | 8.443 | 2.6   |       |       |
| 15 | 5.977 | 18.81 | 4     | 4.389 | 8.067 | 9.488 | 59.35 | 8.610 | 3.803 | 3.803 | 3.636 | 4.096 | 7.858 | 98.81 | 306.9 | 7.231 | 15.21 | 4.430 | 11.16 | 171.7 | 381.0 | 259.4 | 214.2 | 10.99 | 10.65 |
| 16 | 3.594 | 5.308 | 7.691 | 142.8 | 15.75 | 416.4 | 185.4 | 5.141 | 4.472 | 4.848 | 23.99 | 249.0 | 3.845 | 7.231 | 456.9 | 2.758 | 11.20 | 258.6 | 1194. | 134.0 | 199.9 | 987.8 | 533.3 | 12.58 |       |
| 17 | 2.340 | 8     | 5.434 | 22    | 59    | 72    | 57    | 05    | 4     | 6     | 6     | 4.598 | 2     | 52    | 99    | 0     | 14    | 42    | 24    | 82    | 34    | 82    | 3     | 88    | 6     |
| 18 | 4.096 | 11.95 | 5.099 | 244.6 | 11.74 | 12.37 | 27.00 | 5.726 | 7.482 | 28.13 | 3.678 | 7.565 | 2.758 | 357.0 | 92.83 | 116.7 | 1.504 | 5.266 | 2.424 | 1.713 | 5.099 | 38.16 |       |       |       |
| 19 | 4.054 | 4.765 | 425.6 | 253.3 | 70.60 | 17.43 | 291.1 | 413.3 | 11.95 | 21.98 | 616.3 | 724.0 | 16.63 | 4.890 | 4.430 | 11.20 | 40.50 | 92.83 | 546.9 |       | 11.20 | 240.7 | 514.5 |       |       |
| 20 | 3.009 | 4.681 | 83.43 | 366.7 | 235.2 | 269.8 | 485.0 | 40.96 | 6.437 | 9.781 | 27.00 | 983.0 | 299.9 | 6.353 | 11.16 | 258.6 | 483.1 | 116.7 | 546.9 | 448.8 | 51.95 | 26.58 | 86.35 | 1044. | 422.1 |
| 21 | 4.221 | 6.102 | 20.06 | 77.70 | 568.3 | 170.2 |       | 3.887 | 13.25 | 222.1 | 5.977 | 171.7 | 1194. | 237.3 | 1.504 | 448.8 | 751.6 | 414.4 | 1106. | 340.7 |       |       |       |       |       |
| 22 | 15.80 | 10.53 | 22.11 | 28.59 | 47.15 | 24.57 |       | 4.974 | 6.980 | 15.59 | 97.68 | 381.0 | 134.0 | 84.14 | 5.266 | 51.95 | 751.6 | 675.1 | 602.9 | 14.79 | 14.29 |       |       |       |       |
| 23 | 4.305 | 6.186 | 9.697 | 12.28 | 23.82 | 39.75 | 7.231 | 4.639 | 4.848 | 7.607 | 21.98 | 42.92 | 6.729 | 259.4 | 199.9 | 56.38 | 2.424 | 26.58 | 414.4 | 675.1 | 609.5 | 24.45 | 16.63 |       |       |
| 24 | 3.009 |       | 15.08 | 19.26 | 701.4 | 149.3 | 5.977 | 4.472 | 5.141 | 7.774 | 35.36 | 133.9 | 7.900 | 214.2 | 987.8 | 30.72 | 1.713 | 11.20 | 86.35 | 1106. | 602.9 | 609.5 | 604.1 | 22.65 |       |
| 25 | 3.469 | 5.392 | 26.41 | 96.85 | 17.01 | 687.5 | 905.8 | 10.07 | 6.771 | 9.572 | 16.46 | 929.2 | 299.5 | 7.064 | 10.99 | 533.3 | 299.2 | 5.099 | 240.7 | 1044. | 340.7 | 14.79 | 24.45 | 97.85 |       |
| 26 | 12.08 | 60.69 | 78.58 | 7.691 | 16.17 | 195.5 | 208.2 | 13.66 | 104.5 | 128.5 | 314.5 | 22.19 | 8.443 | 10.65 | 12.58 | 6.980 | 38.16 | 514.5 | 422.1 | 14.29 | 16.63 | 22.65 | 97.85 | 0     |       |

**Table S2** Equilibration distances (nm) and harmonic constants (kJ/(mol nm<sup>2</sup>)) in the 26-site triad N-BAR hENM model.

| Equilibration distance | 1     | 2     | 3     | 4     | 5     | 6     | 7     | 8     | 9     | 10    | 11    | 12    | 13    | 14    | 15    | 16    | 17    | 18    | 19    | 20    | 21    | 22    | 23    | 24    | 25    | 26    |    |   |
|------------------------|-------|-------|-------|-------|-------|-------|-------|-------|-------|-------|-------|-------|-------|-------|-------|-------|-------|-------|-------|-------|-------|-------|-------|-------|-------|-------|----|---|
| 1                      | 0     | 1.879 | 3.900 | 5.802 | 7.181 | 7.363 | 8.679 | 6.979 | 4.598 | 3.887 | 4.760 | 6.907 | 9.206 | 10.23 | 10.24 | 9.959 | 7.305 | 5.634 | 5.576 | 5.231 | 7.019 | 9.289 | 11.21 | 9.976 | 7.807 | 6.318 |    |   |
| 2                      | 1.879 | 0     | 2.795 | 5.109 | 6.325 | 6.421 | 8.191 | 6.141 | 3.194 | 2.029 | 3.338 | 6.199 | 8.839 | 10.63 | 10.28 | 9.714 | 6.981 | 5.766 | 5.660 | 4.697 | 6.842 | 9.246 | 11.26 | 9.920 | 7.476 | 5.649 |    |   |
| 3                      | 3.900 | 2.795 | 0     | 2.873 | 4.483 | 4.284 | 5.936 | 3.613 | 1.231 | 2.543 | 1.124 | 3.531 | 6.402 | 9.512 | 8.979 | 7.810 | 5.024 | 4.450 | 4.050 | 2.221 | 4.715 | 7.558 | 9.771 | 8.066 | 5.098 | 2.934 |    |   |
| 4                      | 5.802 | 5.109 | 2.873 | 0     | 2.072 | 1.892 | 3.122 | 1.331 | 2.693 | 4.965 | 3.228 | 1.763 | 3.895 | 7.130 | 6.352 | 4.965 | 2.240 | 2.637 | 2.341 | 1.537 | 2.326 | 4.835 | 7.055 | 5.316 | 2.683 | 2.513 |    |   |
| 5                      | 7.181 | 6.325 | 4.483 | 2.072 | 0     | 0.859 | 2.812 | 2.175 | 3.796 | 5.933 | 4.541 | 3.164 | 4.220 | 6.800 | 5.490 | 4.218 | 2.354 | 3.579 | 3.712 | 3.598 | 3.372 | 4.375 | 6.262 | 4.931 | 3.540 | 4.308 |    |   |
| 6                      | 7.363 | 6.421 | 4.284 | 1.892 | 0.859 | 0     | 2.633 | 1.518 | 3.614 | 5.864 | 4.221 | 2.554 | 3.860 | 7.279 | 6.007 | 4.411 | 2.490 | 3.889 | 3.834 | 3.290 | 3.258 | 4.684 | 6.663 | 5.112 | 3.213 | 3.742 |    |   |
| 7                      | 8.679 | 8.191 | 5.936 | 3.122 | 2.812 | 2.633 | 0     | 2.597 | 5.700 | 8.027 | 6.156 | 2.954 | 1.609 | 5.598 | 4.523 | 2.277 | 1.566 | 3.678 | 3.559 | 4.060 | 2.158 | 2.734 | 4.784 | 1.735 | 4.290 | 8.777 |    |   |
| 8                      | 6.979 | 6.141 | 3.613 | 1.331 | 2.175 | 1.518 | 2.597 | 0     | 3.309 | 5.661 | 3.634 | 1.042 | 3.220 | 7.557 | 6.605 | 4.768 | 2.466 | 3.645 | 3.255 | 2.143 | 2.514 | 4.941 | 7.136 | 5.230 | 2.308 | 2.583 |    |   |
| 9                      | 4.598 | 3.194 | 1.231 | 2.693 | 3.796 | 3.614 | 5.700 | 3.309 | 0     | 2.356 | 0.980 | 3.557 | 6.704 | 9.535 | 8.752 | 7.569 | 4.896 | 4.680 | 4.420 | 2.691 | 4.900 | 7.442 | 9.883 | 5.206 | 3.254 | 3.166 |    |   |
| 10                     | 3.887 | 2.029 | 2.543 | 4.965 | 5.933 | 5.864 | 8.027 | 5.661 | 2.356 | 0     | 2.305 | 5.826 | 8.722 | 11.38 | 10.71 | 9.797 | 7.104 | 6.473 | 6.286 | 4.720 | 7.075 | 9.571 | 11.64 | 10.18 | 7.474 | 5.323 |    |   |
| 11                     | 4.760 | 3.338 | 1.124 | 3.228 | 4.541 | 4.221 | 6.156 | 3.634 | 0.980 | 2.305 | 0     | 3.651 | 6.655 | 10.20 | 9.492 | 8.156 | 5.466 | 5.266 | 4.870 | 2.807 | 5.264 | 8.057 | 10.26 | 8.528 | 5.468 | 3.109 |    |   |
| 12                     | 6.907 | 6.199 | 3.531 | 1.763 | 3.164 | 2.554 | 2.954 | 1.042 | 3.557 | 5.826 | 3.651 | 0     | 3.048 | 7.797 | 7.071 | 5.157 | 2.841 | 3.744 | 3.140 | 1.718 | 2.334 | 5.253 | 7.513 | 5.441 | 2.015 | 1.404 |    |   |
| 13                     | 9.206 | 8.839 | 6.402 | 3.895 | 4.220 | 3.860 | 1.609 | 3.220 | 6.404 | 8.722 | 6.655 | 3.048 | 0     | 6.084 | 5.411 | 3.059 | 2.635 | 4.316 | 3.936 | 4.285 | 2.298 | 3.436 | 5.790 | 3.129 | 1.409 | 4.123 |    |   |
| 14                     | 10.23 | 10.63 | 9.512 | 7.130 | 6.800 | 7.279 | 5.598 | 7.557 | 9.535 | 11.38 | 10.20 | 7.797 | 6.084 | 0     | 2.062 | 3.858 | 5.098 | 5.118 | 5.660 | 7.869 | 5.584 | 2.899 | 2.207 | 3.210 | 6.108 | 8.743 |    |   |
| 15                     | 10.24 | 10.28 | 8.979 | 6.352 | 5.490 | 6.007 | 4.523 | 6.605 | 8.752 | 10.71 | 9.492 | 7.071 | 5.411 | 2.062 | 0     | 2.563 | 4.278 | 4.969 | 5.544 | 7.413 | 5.191 | 2.032 | 1.249 | 2.521 | 5.559 | 8.231 |    |   |
| 16                     | 9.959 | 9.714 | 7.810 | 4.965 | 4.218 | 4.411 | 2.277 | 4.768 | 7.569 | 9.797 | 8.156 | 5.157 | 3.059 | 3.858 | 2.563 | 0     | 2.814 | 4.448 | 4.670 | 5.976 | 3.625 | 1.205 | 2.564 | 1.091 | 3.563 | 6.428 |    |   |
| 17                     | 7.305 | 6.981 | 5.024 | 2.240 | 2.354 | 2.490 | 1.566 | 2.466 | 4.896 | 7.104 | 5.466 | 2.841 | 2.635 | 5.098 | 4.278 | 2.814 | 0     | 2.156 | 2.192 | 3.246 | 1.386 | 2.608 | 4.861 | 3.093 | 1.848 | 3.985 |    |   |
| 18                     | 5.634 | 5.766 | 4.450 | 2.637 | 3.579 | 3.889 | 3.678 | 3.645 | 4.680 | 6.473 | 5.266 | 3.744 | 4.316 | 5.118 | 4.969 | 4.448 | 2.156 | 0     | 0.881 | 3.040 | 2.130 | 3.697 | 5.753 | 4.354 | 3.162 | 4.282 |    |   |
| 19                     | 5.576 | 5.660 | 4.050 | 2.341 | 3.712 | 3.834 | 3.559 | 3.255 | 4.420 | 6.286 | 4.870 | 3.140 | 3.936 | 5.660 | 5.544 | 4.670 | 2.192 | 0.881 | 0     | 2.386 | 1.649 | 4.030 | 6.206 | 4.544 | 2.659 | 3.540 |    |   |
| 20                     | 5.231 | 4.697 | 2.221 | 1.537 | 3.598 | 3.290 | 4.060 | 2.143 | 2.691 | 4.720 | 2.807 | 1.718 | 4.285 | 7.869 | 7.413 | 5.976 | 3.246 | 3.040 | 2.386 | 0     | 2.610 | 5.742 | 8.031 | 6.117 | 2.941 | 1.463 |    |   |
| 21                     | 7.019 | 6.842 | 4.715 | 2.326 | 3.372 | 3.258 | 2.158 | 2.514 | 4.900 | 7.075 | 5.264 | 2.334 | 2.298 | 5.584 | 5.191 | 3.625 | 1.386 | 2.130 | 1.649 | 2.610 | 0     | 3.318 | 5.612 | 3.574 | 1.051 | 3.180 |    |   |
| 22                     | 9.289 | 9.246 | 7.558 | 4.835 | 4.375 | 4.684 | 2.734 | 4.941 | 7.442 | 9.571 | 8.057 | 5.253 | 3.436 | 2.899 | 2.032 | 1.205 | 2.608 | 3.697 | 4.030 | 5.742 | 3.318 | 0     | 2.305 | 0.942 | 3.580 | 6.396 |    |   |
| 23                     | 11.21 | 11.26 | 9.976 | 7.055 | 6.262 | 6.663 | 4.784 | 7.136 | 9.584 | 11.64 | 10.26 | 7.513 | 5.390 | 2.207 | 1.249 | 2.564 | 4.861 | 5.753 | 6.206 | 8.031 | 5.612 | 2.305 | 0     | 2.303 | 5.813 | 8.689 |    |   |
| 24                     | 9.976 | 9.920 | 8.066 | 5.316 | 4.931 | 5.112 | 5.230 | 7.983 | 10.18 | 8.528 | 5.441 | 3.129 | 3.210 | 2.521 | 1.091 | 3.093 | 4.354 | 4.544 | 6.117 | 3.574 | 0.942 | 2.303 | 0     | 3.609 | 6.586 | 3.576 |    |   |
| 25                     | 7.807 | 7.476 | 5.098 | 2.683 | 3.540 | 3.213 | 1.735 | 2.308 | 5.206 | 7.474 | 5.468 | 2.015 | 1.409 | 6.108 | 5.559 | 3.563 | 1.848 | 3.162 | 2.659 | 2.941 | 1.051 | 3.580 | 5.813 | 3.609 | 0     | 3.029 |    |   |
| 26                     | 6.318 | 5.649 | 2.934 | 2.513 | 4.308 | 3.742 | 4.290 | 2.283 | 3.354 | 5.323 | 3.109 | 1.404 | 4.123 | 8.743 | 8.231 | 6.428 | 3.985 | 4.282 | 3.540 | 1.463 | 3.180 | 6.396 | 8.689 | 6.586 | 3.029 | 0     |    |   |
| Harmonic constant      | 0     | 799.4 | 0.459 | 0.083 |       |       | 0.167 | 0.167 | 0.250 | 0.585 | 18.22 | 0.250 |       | 26.12 | 6.520 | 0.167 | 0.125 | 0.501 | 39.45 |       | 0.167 | 0.501 | 0.250 |       | 12.20 |       |    |   |
| 1                      | 0     | 11.87 | 0.292 | 3.009 | 10.53 | 0.501 |       | 128.0 | 65.37 | 107.4 | 0.501 | 0.543 | 18.55 |       |       | 0.292 | 92.29 | 49.65 | 0.501 | 0.543 |       | 0.668 | 0.501 | 70.43 |       |       |    |   |
| 2                      | 25    | 0     | 12    | 6     | 6     | 36    | 6     | 0.418 | 33    | 52    | 26    | 6     | 4     | 92    | 1.463 | 0.418 | 6     | 44    | 84    | 6     | 4     | 0.418 | 1.045 | 8     | 6     | 3     |    |   |
| 3                      | 459   | 11.87 |       | 1148. |       | 0.250 | 2.382 | 845.9 | 2422. | 1236. | 2007. | 354.8 | 0.877 |       | 0.877 | 1.003 | 1.295 | 0.334 | 0.167 | 1.086 | 1.170 | 0.710 | 1.128 | 1.295 | 2.173 | 232.6 |    |   |
| 4                      | 0.083 | 0.292 | 1148. |       | 110.8 | 210.7 | 468.8 | 1220. | 307.7 | 2.466 | 270.2 | 830.3 |       | 0.501 | 1.170 | 1.086 | 197.6 | 0.919 | 27.37 | 721.9 | 786.3 | 0.919 | 1.379 | 3.093 | 8.485 | 59.48 |    |   |
| 5                      | 0.209 | 3.009 | 6     | 0.209 | 54    | 0     | 91    | 2     | 18    | 4     | 0.418 | 4     |       | 2     | 76    | 6     | 2     | 58    | 38    | 42    | 84    | 0.209 | 92    | 4     | 2     | 68    | 2  |   |
| 6                      | 0.209 | 36    | 8     | 14    | 91    | 0     | 45    | 4     | 2     | 2     | 4     | 8     | 0.418 | 1.463 | 6     | 4     | 8     | 0.418 | 1.463 | 6     | 4     | 0.209 | 6     | 2     | 2     | 6     | 12 | 2 |
| 7                      | 0.167 | 0.501 | 2.382 | 468.8 | 2.884 | 142.2 |       | 863.3 | 1.588 | 2.591 | 1.588 | 867.3 |       | 0.961 | 115.0 | 678.9 | 0.459 | 0.668 |       |       | 29.21 | 461.2 |       | 306.9 | 1748. | 0.877 |    |   |
| 8                      | 0.167 | 845.9 | 1220. | 35.57 | 1.170 | 863.3 |       | 1742. | 1.504 | 176.5 | 2917. | 404.7 | 0.501 | 8.945 | 0.459 | 467.1 | 0.334 | 15.80 | 79.08 | 181.2 | 0.919 | 1.170 | 0.668 | 1486. | 497.6 |       |    |   |
| 9                      | 0.250 | 128.0 | 2422. | 307.7 | 0.125 | 0.167 | 1.588 | 1742. |       | 2168. | 1742. | 135.4 | 1.170 | 19.43 | 16.13 | 0.501 | 1.128 | 30.68 | 0.501 | 365.0 | 2.173 | 0.961 | 1.755 | 1.922 | 1.421 | 10.95 |    |   |
| 10                     | 0.585 | 65.37 | 1236. | 2.466 |       | 0.376 | 2.591 | 1.504 | 2168. |       | 2730. | 1.212 | 0.961 | 3.051 |       | 1.086 |       | 4.096 | 0.292 |       | 1.295 | 1.170 | 3.720 | 3.051 |       | 1.337 |    |   |
| 11                     | 18.22 | 107.4 | 2007. | 270.2 | 0.125 | 0.125 | 1.588 | 176.5 | 1742. | 2730. |       | 903.2 | 2.006 | 0.877 | 3.636 | 0.585 | 1.170 | 0.459 | 0.292 | 527.4 | 1.713 | 1.128 | 2.131 |       | 3.218 | 101.7 |    |   |
|                        | 48    | 26    | 11    | 37    | 4     | 4     | 4     | 63    | 64    | 5     | 0     | 56    | 4     | 8     | 6     | 2     | 4     | 8     | 6     | 2     | 4     | 8     | 6     | 8     | 4.807 | 6     | 83 |   |

|    |       |       |       |       |       |       |       |       |       |       |       |       |       |       |       |       |       |       |       |       |       |       |       |       |       |       |   |
|----|-------|-------|-------|-------|-------|-------|-------|-------|-------|-------|-------|-------|-------|-------|-------|-------|-------|-------|-------|-------|-------|-------|-------|-------|-------|-------|---|
| 12 | 0.250 | 0.501 | 354.8 | 830.3 | 1.212 | 1.755 | 867.3 | 2917. | 135.4 | 1.212 | 903.2 | 198.2 | 2.591 | 0.794 | 1.212 | 0.292 | 94.30 | 1197. | 1471. | 1.003 | 1.379 | 1.003 | 1513. | 174.8 |       |       |   |
|    | 8     | 6     | 82    | 57    | 2     | 6     | 08    | 85    | 32    | 2     | 56    | 0     | 16    | 0.418 | 6     | 2     | 2     | 6     | 08    | 49    | 69    | 2     | 4     | 2     | 29    | 49    |   |
|    |       |       | 0.543 | 0.877 |       | 55.67 | 1.379 | 404.7 | 1.170 | 0.961 | 2.006 | 198.2 | 30.22 | 29.13 | 148.8 | 57.26 |       | 52.58 | 348.9 | 77.78 | 115.3 | 48.48 | 0.585 | 0.376 |       |       |   |
| 13 | 0.209 | 4     | 8     | 0.627 | 76    | 4     | 8.778 | 08    | 4     | 4     | 4     | 16    | 0     | 14    | 0.418 | 46    | 5     | 6     | 0.209 | 44    | 46    | 98    | 68    | 8     | 2     | 2     |   |
|    | 26.12 | 18.55 |       | 0.501 | 0.501 | 0.250 |       | 0.501 | 19.43 | 3.051 | 0.877 |       | 30.22 | 332.7 | 0.919 | 0.292 | 21.61 | 5.308 | 0.334 | 0.250 | 0.250 | 46.39 | 22.82 | 0.585 |       |       |   |
| 14 | 5     | 92    | 0.418 | 6     | 6     | 8     | 0.418 | 6     | 7     | 4     | 8     | 0.418 | 14    | 0     | 7     | 6     | 6     | 06    | 6     | 4     | 8     | 8     | 8     | 28    | 2     | 0.418 |   |
|    | 6.520 | 0.877 | 1.170 | 2.884 |       | 0.961 | 8.945 | 16.13 |       | 3.636 | 2.591 |       | 332.7 | 169.7 | 0.501 | 15.67 | 58.47 | 1.839 | 5.684 |       | 402.2 | 83.76 | 1.839 | 71.51 |       |       |   |
| 15 | 8     | 1.463 | 8     | 4     | 2     | 0.418 | 4     | 2     | 48    | 7.106 | 6     | 6     | 0.418 | 7     | 0     | 08    | 6     | 5     | 82    | 2     | 8     | 1.463 | 41    | 72    | 2     | 98    |   |
|    | 0.167 | 1.003 | 1.086 | 47.27 |       | 115.0 | 0.459 | 0.501 | 1.086 | 0.585 | 0.794 | 29.13 | 0.919 | 169.7 |       | 1311. | 0.250 | 0.250 | 0.543 | 155.4 | 2160. | 954.0 | 1947. | 1094. | 0.752 |       |   |
| 16 | 2     | 0.418 | 2     | 8     | 58    | 1.463 | 75    | 8     | 6     | 8     | 2     | 2     | 46    | 6     | 08    | 0     | 85    | 8     | 8     | 4     | 96    | 27    | 85    | 13    | 16    | 4     |   |
|    | 0.125 | 0.292 | 1.295 | 197.6 | 158.3 | 97.47 | 678.9 | 467.1 | 1.128 |       | 1.170 | 1.212 | 148.8 | 0.292 | 0.501 | 1311. |       | 153.6 | 0.334 | 0.376 | 541.3 | 216.1 |       | 309.3 | 472.3 | 0.334 |   |
| 17 | 4     | 6     | 8     | 72    | 38    | 76    | 57    | 99    | 6     | 3.762 | 4     | 2     | 5     | 6     | 6     | 85    | 0     | 57    | 4     | 2     | 52    | 9     | 1.463 | 62    | 4     | 4     |   |
|    | 0.501 | 92.29 | 0.334 | 0.919 | 69.76 | 0.501 | 0.459 | 0.334 | 30.68 | 4.096 | 0.459 | 0.292 | 57.26 | 21.61 | 15.67 | 0.250 | 153.6 |       | 108.2 |       | 71.35 | 0.125 | 0.292 | 0.250 | 14.25 | 0.877 |   |
| 18 | 6     | 44    | 4     | 6     | 42    | 6     | 8     | 4     | 12    | 4     | 8     | 6     | 6     | 06    | 5     | 8     | 57    | 0     | 2     | 0.209 | 26    | 4     | 6     | 8     | 38    | 8     |   |
|    | 39.45 | 49.65 | 0.167 | 27.37 | 60.10 | 0.961 | 0.668 | 15.80 | 0.501 | 0.292 | 0.292 | 94.30 |       | 5.308 | 58.47 | 0.250 | 0.334 | 108.2 |       | 0.459 | 0.250 | 0.167 | 0.376 | 0.334 | 70.60 |       |   |
| 19 | 92    | 84    | 2     | 9     | 84    | 4     | 8     | 04    | 6     | 6     | 6     | 08    | 0.209 | 6     | 82    | 8     | 4     | 2     | 0     | 8     | 8     | 2     | 2     | 4     | 1.672 | 02    |   |
|    | 0.501 | 1.086 | 721.9 |       |       | 79.08 | 365.0 |       | 527.4 | 1197. | 52.58 | 0.334 | 1.839 | 0.543 | 0.376 |       | 0.459 |       | 1143. | 0.710 | 1.212 | 1.337 | 542.8 | 1034. |       |       |   |
| 20 | 0.209 | 6     | 8     | 28    | 0.209 | 0.209 | 1.045 | 56    | 81    | 1.045 | 32    | 49    | 44    | 4     | 2     | 4     | 2     | 0.209 | 8     | 0     | 4     | 6     | 2     | 6     | 98    | 17    |   |
|    | 0.167 | 0.543 | 1.170 | 786.3 | 130.7 | 0.501 | 29.21 | 181.2 | 2.173 | 1.295 | 1.713 | 1471. | 348.9 | 0.250 | 5.684 | 155.4 | 541.3 | 71.35 | 0.250 | 1143. |       | 1008. | 1.630 | 199.2 | 3742. | 142.1 |   |
| 21 | 2     | 4     | 4     | 83    | 92    | 6     | 82    | 45    | 6     | 8     | 8     | 69    | 46    | 8     | 8     | 96    | 52    | 26    | 8     | 4     | 0     | 17    | 2     | 19    | 1     | 2     |   |
|    | 0.710 | 0.919 | 9.530 | 0.585 | 461.2 | 0.919 | 0.961 | 1.170 | 1.128 | 1.003 | 77.78 | 0.250 |       | 2160. | 216.1 | 0.125 | 0.167 | 0.710 | 1008. |       | 951.9 | 2785. | 463.1 |       |       |       |   |
| 22 | 0.209 | 0.418 | 6     | 6     | 4     | 2     | 21    | 6     | 4     | 4     | 6     | 2     | 98    | 8     | 1.463 | 27    | 9     | 4     | 2     | 6     | 17    | 0     | 53    | 01    | 86    | 0.836 |   |
|    | 0.501 | 1.128 | 1.379 | 3.093 | 0.585 |       | 1.170 | 1.755 | 3.720 | 2.131 | 1.379 | 115.3 | 46.39 | 402.2 | 954.0 |       | 0.292 | 0.376 | 1.212 | 1.630 | 951.9 |       | 2322. | 3.803 |       |       |   |
| 23 | 6     | 1.045 | 6     | 4     | 2     | 2     | 2.299 | 4     | 6     | 2     | 8     | 4     | 68    | 8     | 41    | 85    | 1.463 | 6     | 2     | 2     | 2     | 53    | 0     | 91    | 8     | 1.254 |   |
|    | 0.250 | 0.668 | 1.295 | 3.093 | 1.003 | 0.919 | 306.9 | 0.668 | 1.922 | 3.051 |       | 1.003 | 48.48 | 22.82 | 83.76 | 1947. | 309.3 | 0.250 | 0.334 | 1.337 | 199.2 | 2785. | 2322. |       | 818.7 | 0.961 |   |
| 24 | 8     | 8     | 8     | 2     | 2     | 2     | 6     | 37    | 8     | 8     | 4     | 4.807 | 2     | 8     | 28    | 72    | 13    | 62    | 8     | 4     | 6     | 19    | 01    | 91    | 0     | 78    | 4 |
|    | 0.501 | 2.173 | 8.485 | 97.22 | 24.41 | 1748. | 1486. | 1.421 |       | 3.218 | 1513. | 0.585 | 0.585 | 1.839 | 1094. | 472.3 | 14.25 |       | 542.8 | 3742. | 463.1 | 3.803 | 818.7 |       | 382.1 |       |   |
| 25 | 0.209 | 6     | 6     | 4     | 68    | 12    | 16    | 66    | 2     | 1.254 | 6     | 29    | 2     | 2     | 2     | 16    | 4     | 38    | 1.672 | 98    | 1     | 86    | 8     | 78    | 0     | 36    |   |
|    | 12.20 | 70.43 | 232.6 | 59.48 | 0.585 | 4.974 | 0.877 | 497.6 | 10.95 | 1.337 | 101.7 | 174.8 | 0.376 |       | 71.51 | 0.752 | 0.334 | 0.877 | 70.60 | 1034. | 142.1 |       | 0.961 | 382.1 |       |       |   |
| 26 | 56    | 3     | 17    | 14    | 2     | 2     | 8     | 71    | 16    | 6     | 83    | 49    | 2     | 0.418 | 98    | 4     | 4     | 8     | 02    | 17    | 2     | 0.836 | 1.254 | 4     | 36    | 0     |   |
